# Supplementary material for: Inhibition of Breast Cancer Cell Invasion by Ras Suppressor-1 (RSU-1) Silencing Is Reversed by Growth Differentiation Factor-15 (GDF-15)
Source: Int J Mol Sci. 2019 Jan 4;20(1):163. doi: 10.3390/ijms20010163 (PMC6337329; doi:10.3390/ijms20010163)
Supplement: Supplementary file 1 [file ijms-20-00163-s001.pdf]

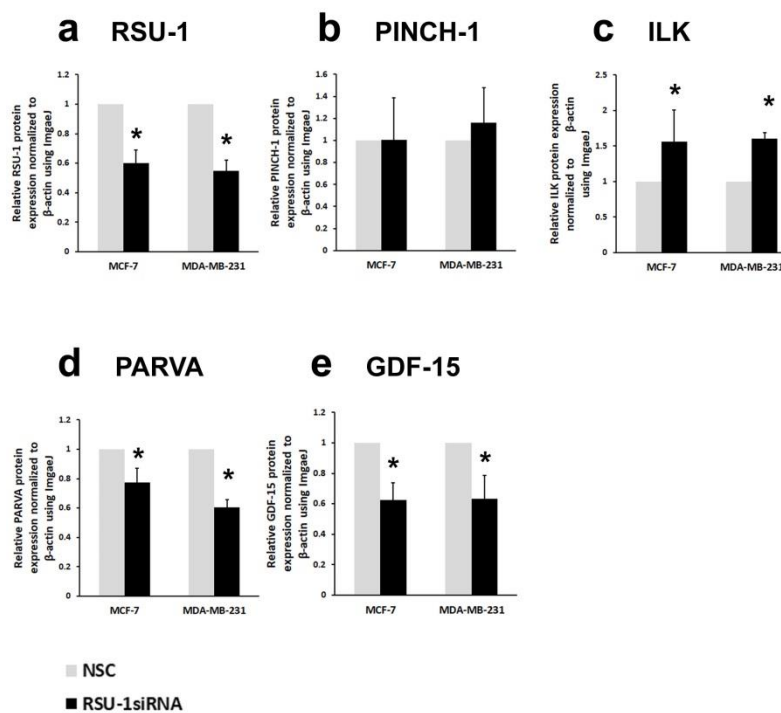

**Supplementary Figure S1.** Relative protein expression of *RSU-1*, *PINCH-1*, *ILK*, *PARVA* and *GDF-15* in MCF-7 and MDA-MB-231 cells following RSU-1 silencing. Protein expression quantification analysis of *RSU-1*, *PINCH-1*, *ILK*, *PARVA* and *GDF-15* was performed using the National Institute of Health Image J software. Several immunoblots were analyzed and the mean intensity of bands was normalized to that of  $\beta$ -actin which was used as loading control in each immunoblot. Relative protein expression of *RSU-1* (a) was quantified from seven (7) different immunoblots, relative protein expression of *PINCH-1* (b) was quantified from five (5) immunoblots, *ILK* (c) from two (2), *PARVA* (d) from three (3) and *GDF-15* (e) from four (4) immunoblots. Statistical significance corresponded to a p value of 0.05.

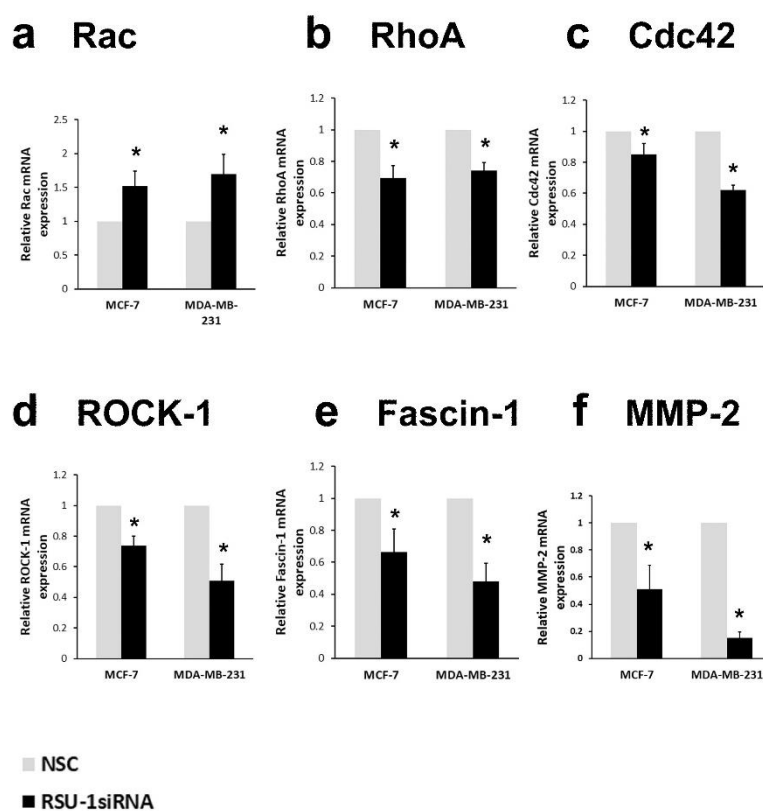

**Supplementary Figure S2.** The effect of *RSU-1* silencing on the mRNA expression of RhoGTPases, *ROCK-1*, *Fascin-1* and *MMP2* in MCF-7 and MDA-MB-231 cells. Relative mRNA expression in MCF-7 and MDA-MB-231 cells of *Rac* (a), *RhoA* (b), *Cdc42* (c), *ROCK-2* (d), *Fascin-1* (e) and *MMP-2* (f) in cells transfected with NSC or RSU-1 siRNA. Three independent Real Time PCR experiments were performed, and data were analyzed using the  $\Delta\Delta C_t$  method and having the NSC-transfected cells as calibrators. Asterisks indicate statistically significant changes ( $p$ -value<0.05).

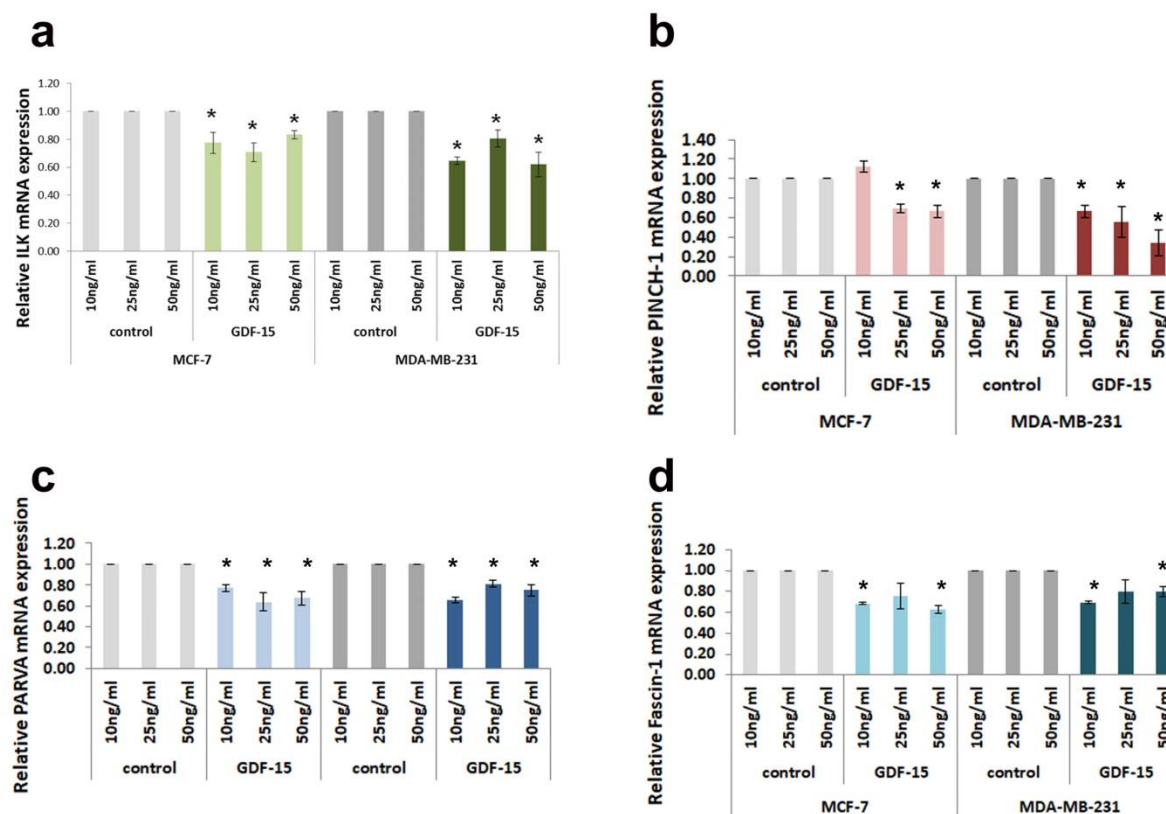

**Supplementary Figure S3. Relative mRNA expression in MCF-7 and MDA-MB-231 cells of ILK (a) PINCH-1 (b), PARVA (c) and Fascin-1 (d) in cells treated with 10, 25 or 50ng/ml of GDF-15 for 24h.** Two independent Real Time PCR experiments were performed, and data were analyzed using the  $\Delta\Delta C_t$  method and having the untreated sample as calibrator. The untreated sample per condition contained equal volume of solvent. Asterisks indicate statistically significant changes (p-value<0.05).

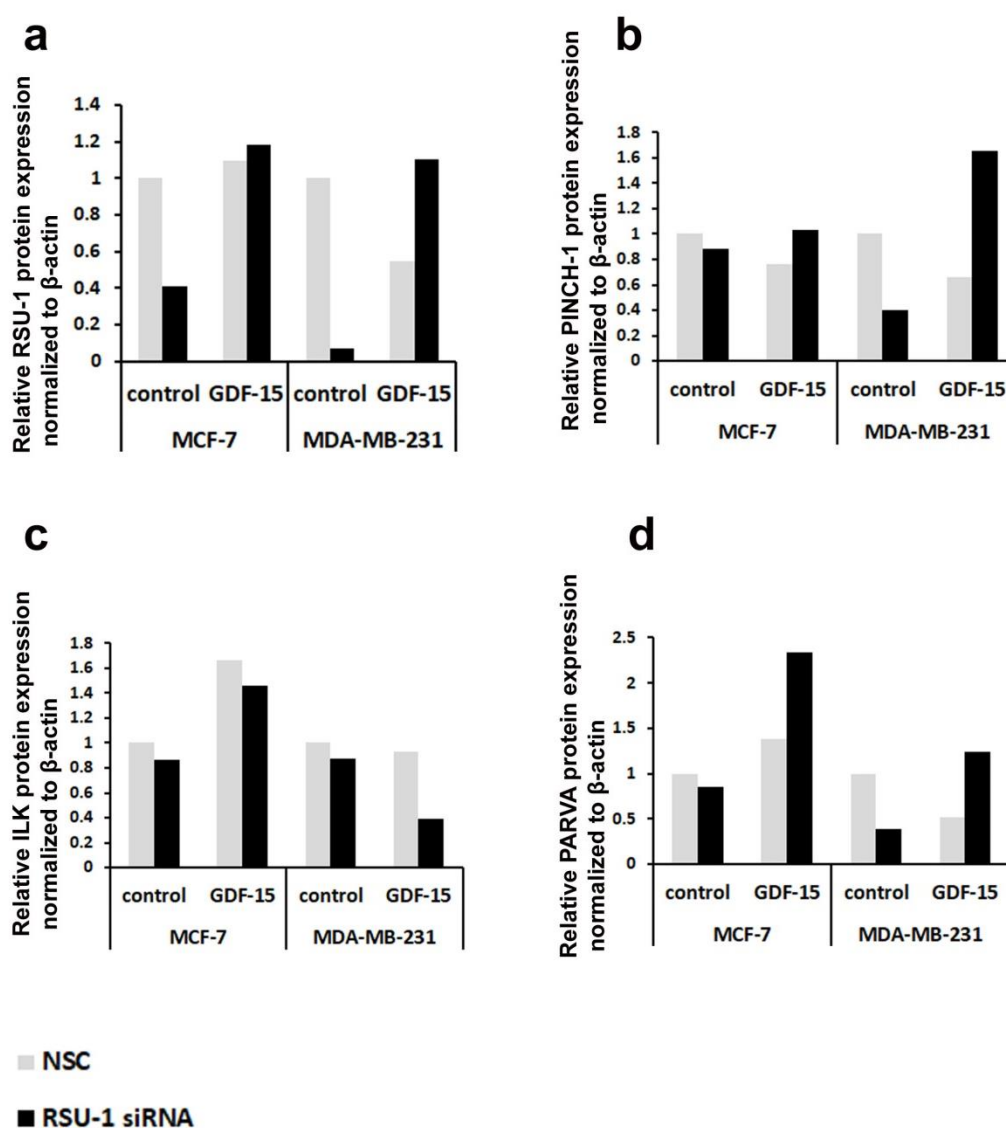

**Supplementary Figure S4.** Relative protein expression of *RSU-1*, *PINCH-1*, *ILK*, and *PARVA* in MCF-7 and MDA-MB-231 cells following RSU-1 silencing in the presence or absence of GDF-15. Protein expression quantification analysis was performed using the Image J software as described previously. The intensity of bands was normalized to that of  $\beta$ -actin and compared to the NSC-treated control (only solvent) sample in MCF-7 and MDA-MB-231 every time.
